# Supplementary material for: Plant-based diets, mediating biomarkers, and mortality risk among adults with diabetes or prediabetes
Source: Royal Society of Chemistry journal article supplement (doi:10.1039/d3fo04793h), 2024-01-01
Supplement: d3fo04793h1.pdf [file d3fo04793h1.pdf]

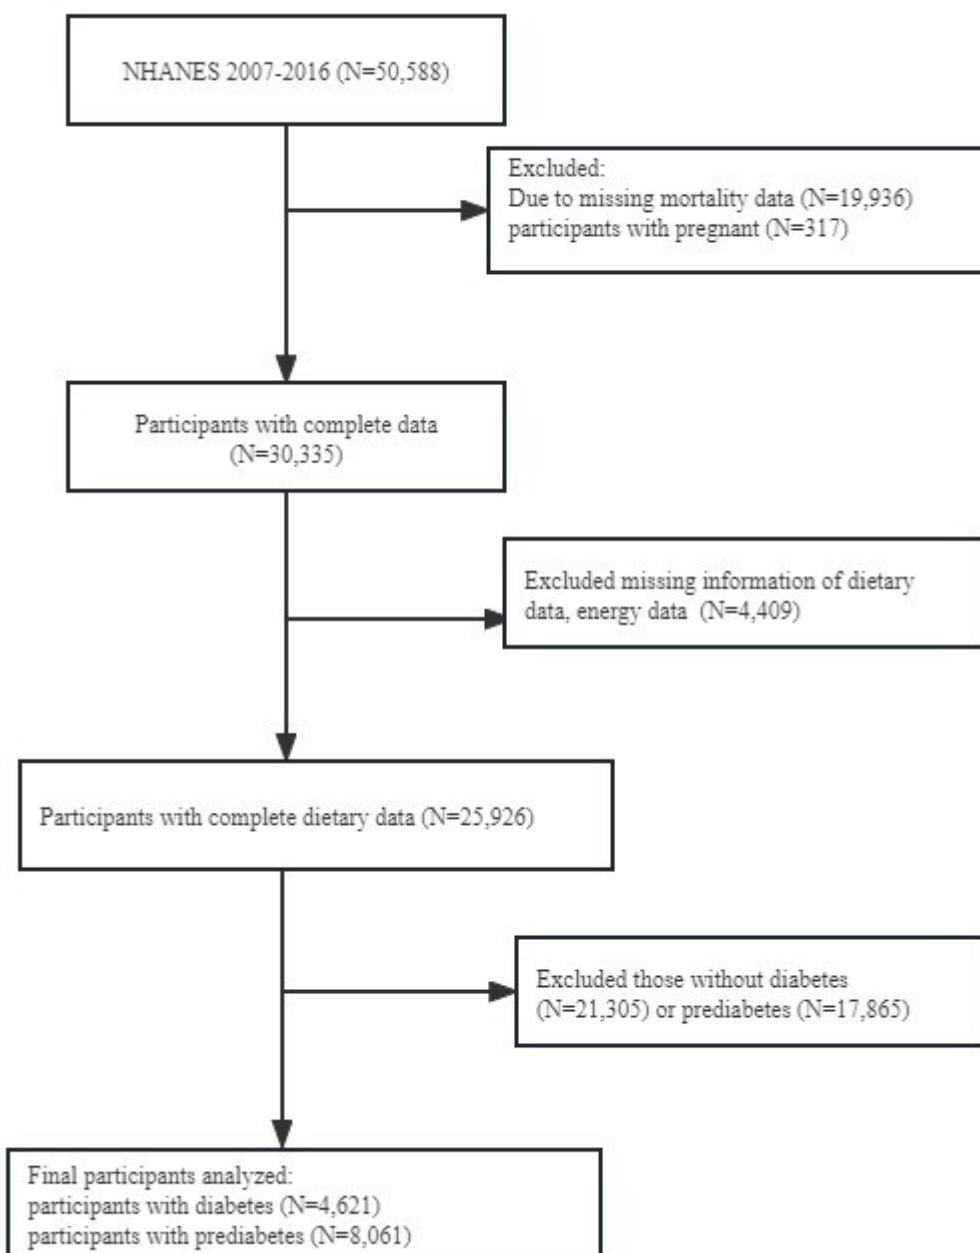

**Supplementary Figure 1.** Flowchart of the selection of the study population from NHANES study

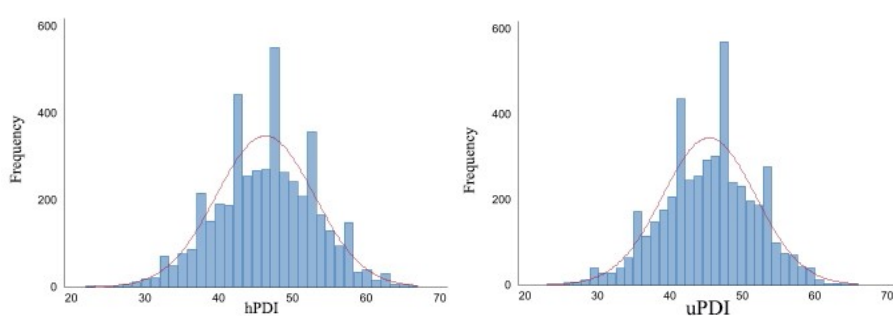

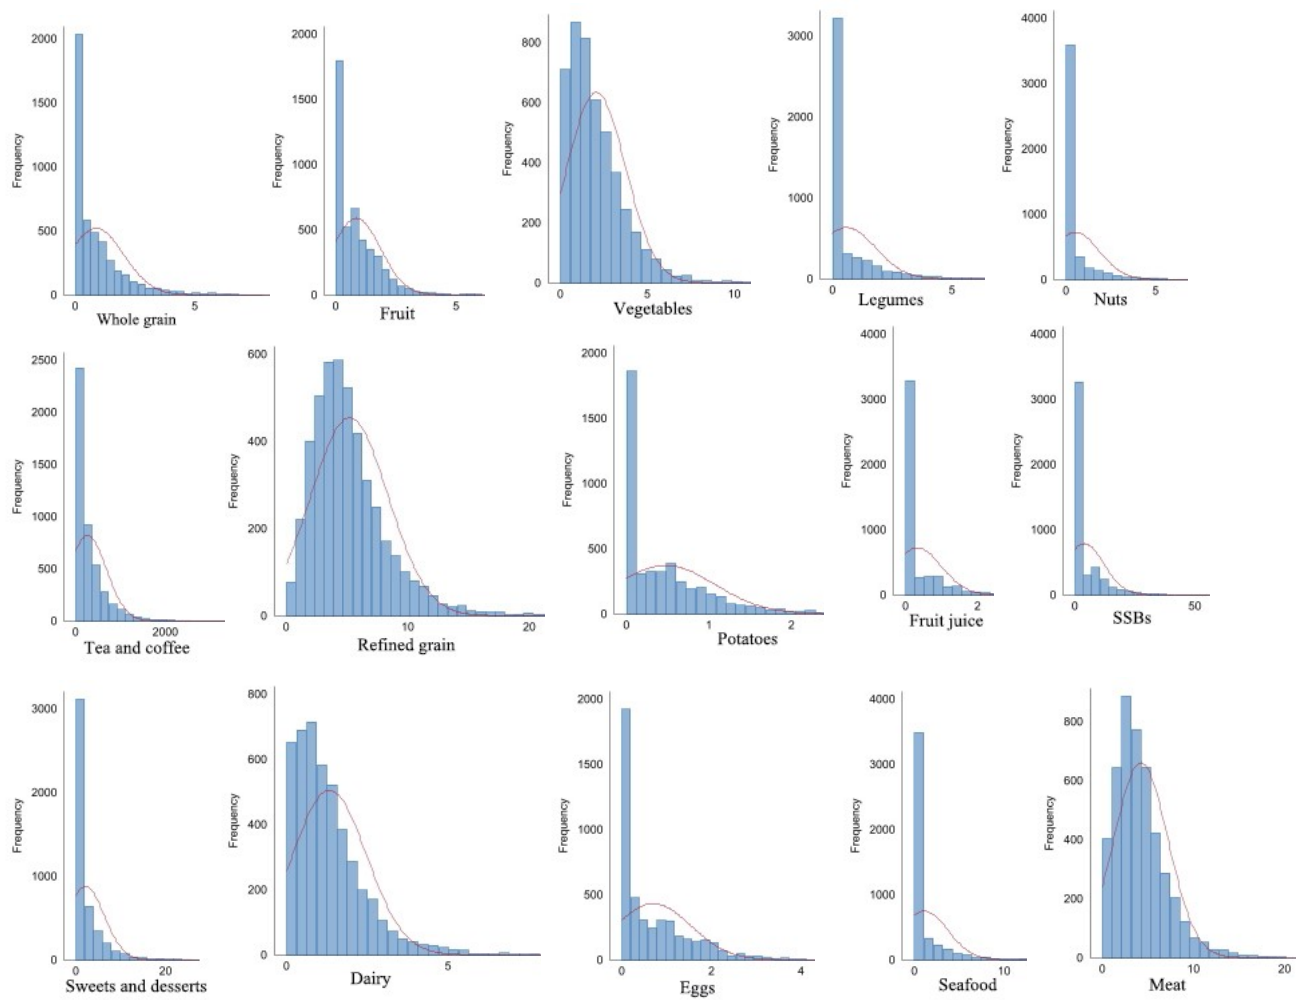

**Supplementary Figure 2.** The distributions of hPDI, uPDI, and the 15 component food groups among participants with diabetes

Whole grain, refined grain, eggs, seafood, meat: oz equiv./2,000 kcal/d;

Fruit, vegetables, nuts, legumes, fruit juice, potatoes, dairy: cup equiv./2,000 kcal/d;

Tea and coffee: mg; added sugar: teaspoons/2,000 kcal/d;

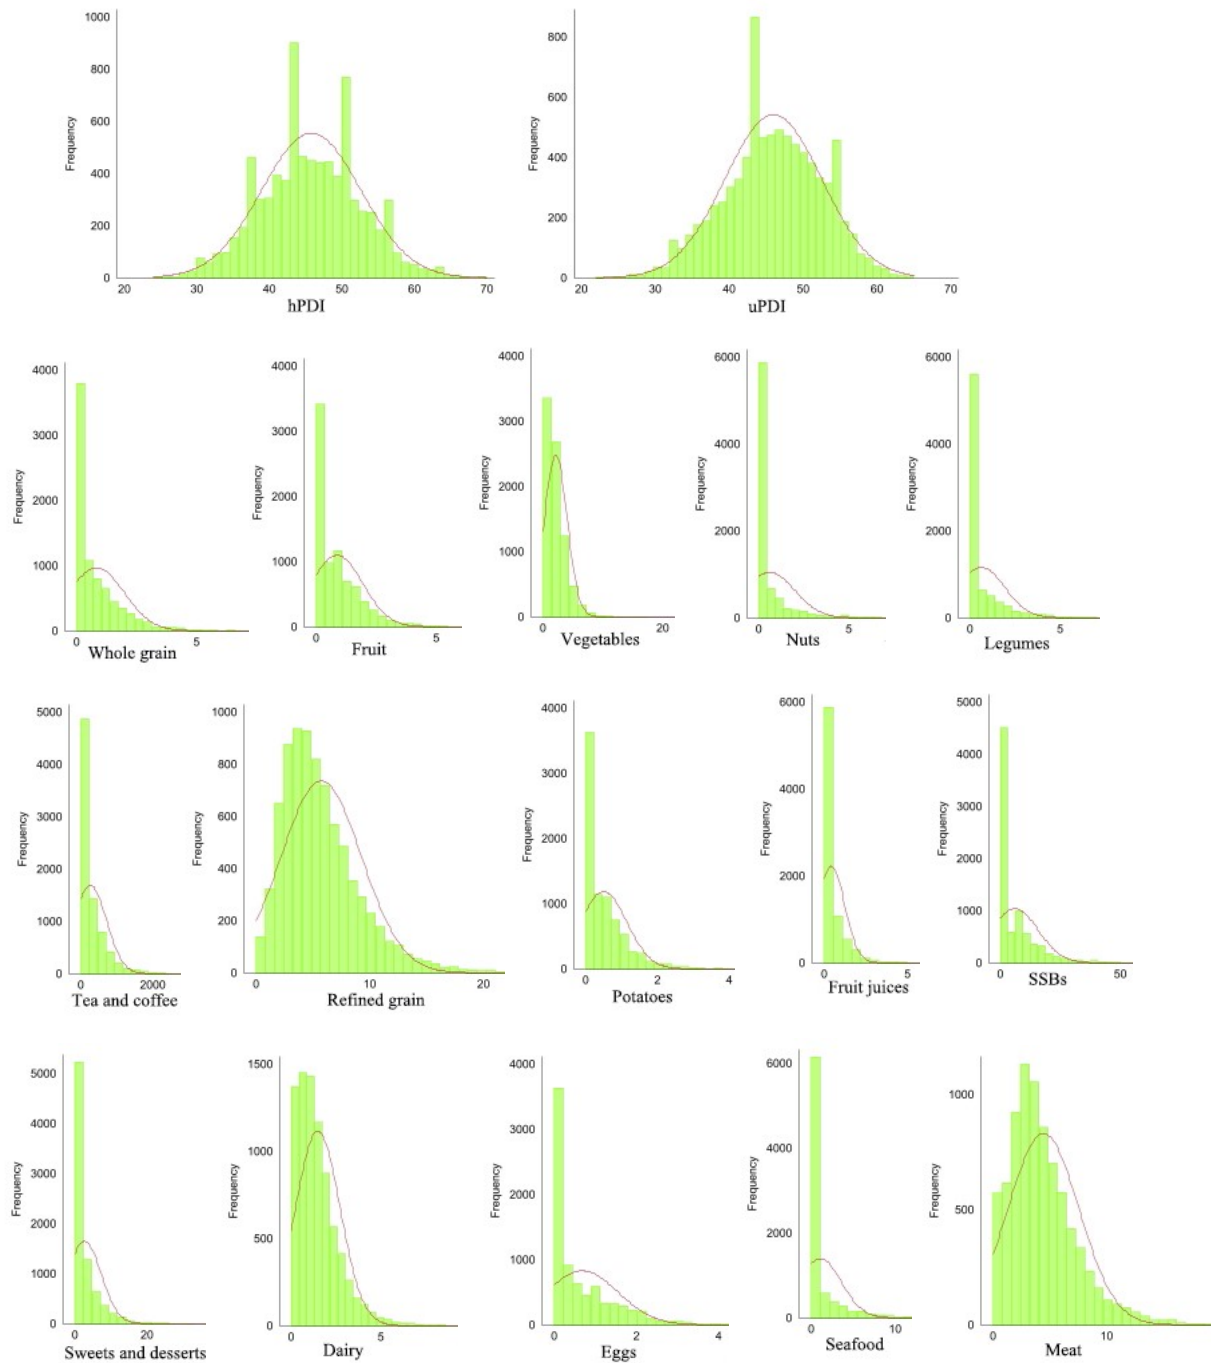

**Supplementary Figure 3.** The distributions of hPDI, uPDI, and the 15 component food groups among participants with prediabetes

Whole grain, refined grain, eggs, seafood, meat: oz equiv./2,000 kcal/d;

Fruit, vegetables, nuts, legumes, fruit juice, potatoes, dairy: cup equiv./2,000 kcal/d;

Tea and coffee: mg; added sugar: teaspoons/2,000 kcal/d;

**Supplementary Table 1.** Details of the 15 food groups and scoring rules

| <b>Food groups</b>                    | <b>Food Items</b>                                                                                                                                                                                                                                                                              | <b>hPDI</b>                    | <b>uPDI</b>   |
|---------------------------------------|------------------------------------------------------------------------------------------------------------------------------------------------------------------------------------------------------------------------------------------------------------------------------------------------|--------------------------------|---------------|
| <b>Healthy plant-based foods</b>      |                                                                                                                                                                                                                                                                                                | <b>Used in the calculation</b> |               |
| Whole grains                          | Dark breads and rolls, wheat bread, rye bread, all bran cereal, all-bran extra fiber, 100% bran                                                                                                                                                                                                | Yes                            | Yes (reverse) |
| Fruit                                 | Citrus fruits, melons, peaches, nectarines, any other fruits                                                                                                                                                                                                                                   | Yes                            | Yes (reverse) |
| Vegetables                            | Carrots, broccoli, brussel sprouts, cauliflower, tomatoes, spinach, greens, collards, kale, tossed salad, cabbage, coleslaw, hot red chili peppers, other peppers, sweet potatoes, yams, orange squash, butternut, pumpkin, green beans, corn, peas, mushrooms, zucchini, any other vegetables | Yes                            | Yes (reverse) |
| Nuts                                  | Peanuts, peanut butter                                                                                                                                                                                                                                                                         | Yes                            | Yes (reverse) |
| Legumes                               | Kidney beans, pinto beans, refried beans, black beans, baked beans, lentils, chickpeas, tofu                                                                                                                                                                                                   | Yes                            | Yes (reverse) |
| Tea and coffee                        | Regular tea, regular coffee                                                                                                                                                                                                                                                                    | Yes                            | Yes (reverse) |
| <b>Less healthy plant-based foods</b> |                                                                                                                                                                                                                                                                                                |                                |               |
| Refined grains                        | Rice, flour tortillas, white breads, rolls, bagels, English muffins, biscuits, corn bread, muffins, (whole grain) crackers                                                                                                                                                                     | Yes (reverse)                  | Yes           |
| Potatoes                              | White potatoes, French fries, baked and mashed potatoes                                                                                                                                                                                                                                        | Yes (reverse)                  | Yes           |
| Fruit juices                          | Orange juice, other fruit juices                                                                                                                                                                                                                                                               | Yes (reverse)                  | Yes           |
| Sugar sweetened beverages             | Regular colas and sodas, diet colas, diet sodas, Hi-C, Tang, Kool-aid                                                                                                                                                                                                                          | Yes (reverse)                  | Yes           |
| Sweets and desserts                   | Cakes, cookies, brownies, chocolate, candy and fudge                                                                                                                                                                                                                                           | Yes (reverse)                  | Yes           |
| <b>Animal-based foods</b>             |                                                                                                                                                                                                                                                                                                |                                |               |
| Dairy                                 | Whole milk, skim milk, chocolate milk, yogurt, frozen yogurt, ice cream, ice milk, milkshakes, cheese (all types), milk to drink or on cereal                                                                                                                                                  | Yes (reverse)                  | Yes (reverse) |
| Eggs                                  | Eggs                                                                                                                                                                                                                                                                                           | Yes (reverse)                  | Yes (reverse) |
| Seafood                               | Fish, shrimp, clams                                                                                                                                                                                                                                                                            | Yes (reverse)                  | Yes (reverse) |
| Meat                                  | Bacon, sausage, processed meats, liver and organ meats, beef, pork, ham, chicken and turkey                                                                                                                                                                                                    | Yes (reverse)                  | Yes (reverse) |

hPDI: healthful plant-based diet index; uPDI: unhealthful plant-based diet index

**Supplementary Table 2.** Hazard ratios of all-cause, CVD, cancer and other mortality risk based on quartile of hPDI among participants with diabetes (N=4,621)

|                            | Quartile 1    | Quartile 2        | Quartile 3        | Quartile 4        | <i>P</i> -trend | Per 10 point increase |
|----------------------------|---------------|-------------------|-------------------|-------------------|-----------------|-----------------------|
| <b>All-cause mortality</b> |               |                   |                   |                   |                 |                       |
| Deaths/N                   | 227/1,090     | 246/967           | 313/1,327         | 235/1,237         |                 |                       |
| Model 1 (HR [95%CI])       | 1 (reference) | 0.95 (0.80, 1.15) | 0.88 (0.74, 1.04) | 0.60 (0.50, 0.72) | <0.0001         | 0.75 (0.68, 0.83)     |
| Model 2 (HR [95%CI])       | 1 (reference) | 0.96 (0.80, 1.15) | 0.87 (0.73, 1.04) | 0.59 (0.49, 0.72) | <0.0001         | 0.74 (0.67, 0.82)     |
| <b>CVD mortality</b>       |               |                   |                   |                   |                 |                       |
| Deaths/N                   | 68/1,090      | 84/967            | 103/1,327         | 74/1,237          |                 |                       |
| Model 1 (HR [95%CI])       | 1 (reference) | 1.07 (0.77, 1.47) | 0.95 (0.70, 1.30) | 0.62 (0.45, 0.87) | 0.0023          | 0.77 (0.65, 0.91)     |
| Model 2 (HR [95%CI])       | 1 (reference) | 1.08 (0.78, 1.50) | 0.94 (0.69, 1.30) | 0.61 (0.43, 0.87) | 0.0024          | 0.76 (0.63, 0.91)     |
| <b>Cancer mortality</b>    |               |                   |                   |                   |                 |                       |
| Deaths/N                   | 49/1,090      | 53/967            | 63/1,327          | 46/1,237          |                 |                       |
| Model 1 (HR [95%CI])       | 1 (reference) | 0.97 (0.66, 1.44) | 0.84 (0.58, 1.23) | 0.57 (0.38, 0.86) | 0.0047          | 0.72 (0.58, 0.89)     |
| Model 2 (HR [95%CI])       | 1 (reference) | 0.94 (0.63, 1.40) | 0.81 (0.55, 1.19) | 0.55 (0.36, 0.85) | 0.0045          | 0.69 (0.55, 0.87)     |
| <b>Other mortality</b>     |               |                   |                   |                   |                 |                       |
| Deaths/N                   | 110/1,090     | 109/967           | 147/1,327         | 115/1,237         |                 |                       |
| Model 1 (HR [95%CI])       | 1 (reference) | 0.88 (0.67, 1.14) | 0.84 (0.66, 1.08) | 0.60 (0.46, 0.78) | 0.0002          | 0.75 (0.66, 0.87)     |
| Model 2 (HR [95%CI])       | 1 (reference) | 0.88 (0.67, 1.15) | 0.84 (0.65, 1.09) | 0.59 (0.44, 0.78) | 0.0002          | 0.74 (0.64, 0.86)     |

Model 1: adjusted for age (years), sex (male, female), race/ethnicity (Non-Hispanic White, Non-Hispanic Black, Mexican American, other race), education (less than high school, high school or equivalent, college or above), marital status (married, widowed or divorced, separated, never married) and PIR ( $\leq 1$ , 1.1-3.0,  $>3.0$ ).

Model 2: additionally adjusted for BMI (kg/m<sup>2</sup>), smoking status (never, former, current), drinking status (never, former, current), total energy intake (kcal/d), physical activity (MET-min/week), use of antidiabetic medications (yes, no), hyperlipidemia (yes, no), hypertension (yes, no), cardiovascular disease (yes, no), and cancer (yes, no).

**Supplementary Table 3.** Hazard Ratios of all-cause, CVD, cancer and other mortality risk based on quartile of hPDI among participants with prediabetes (N=8,061)

|                            | Quartile 1    | Quartile 2        | Quartile 3        | Quartile 4        | <i>P</i> -trend | Per 10 point increase |
|----------------------------|---------------|-------------------|-------------------|-------------------|-----------------|-----------------------|
| <b>All-cause mortality</b> |               |                   |                   |                   |                 |                       |
| Deaths/N                   | 156/1,792     | 272/2,136         | 201/1,729         | 267/2,404         |                 |                       |
| Model 1 (HR [95%CI])       | 1 (reference) | 1.09 (0.89, 1.32) | 0.80 (0.65, 0.99) | 0.67 (0.54, 0.82) | <0.0001         | 0.74 (0.67, 0.83)     |

|                         |               |                   |                   |                   |         |                   |
|-------------------------|---------------|-------------------|-------------------|-------------------|---------|-------------------|
| Model 2 (HR [95%CI])    | 1 (reference) | 1.08 (0.88, 1.32) | 0.82 (0.66, 1.02) | 0.69 (0.55, 0.85) | <0.0001 | 0.76 (0.68, 0.85) |
| <b>CVD mortality</b>    |               |                   |                   |                   |         |                   |
| Deaths/N                | 39/1,792      | 92/2,136          | 51/1,729          | 79/2,404          |         |                   |
| Model 1 (HR [95%CI])    | 1 (reference) | 1.43 (0.98, 2.08) | 0.77 (0.50, 1.17) | 0.75 (0.50, 1.11) | 0.0017  | 0.73 (0.60, 0.89) |
| Model 2 (HR [95%CI])    | 1 (reference) | 1.32 (0.90, 1.94) | 0.74 (0.48, 1.14) | 0.69 (0.46, 1.05) | 0.0010  | 0.71 (0.57, 0.88) |
| <b>Cancer mortality</b> |               |                   |                   |                   |         |                   |
| Deaths/N                | 45/1,792      | 65/2,136          | 53/1,729          | 72/2,404          |         |                   |
| Model 1 (HR [95%CI])    | 1 (reference) | 0.91 (0.62, 1.33) | 0.75 (0.50, 1.13) | 0.65 (0.44, 0.96) | 0.0141  | 0.72 (0.59, 0.89) |
| Model 2 (HR [95%CI])    | 1 (reference) | 0.91 (0.62, 1.35) | 0.77 (0.51, 1.16) | 0.68 (0.45, 1.02) | 0.0349  | 0.74 (0.60, 0.92) |
| <b>Other mortality</b>  |               |                   |                   |                   |         |                   |
| Deaths/N                | 72/1,792      | 115/2,136         | 97/1,729          | 116/2,404         |         |                   |
| Model 1 (HR [95%CI])    | 1 (reference) | 1.03 (0.76, 1.39) | 0.87 (0.64, 1.19) | 0.65 (0.48, 0.88) | 0.0007  | 0.77 (0.65, 0.90) |
| Model 2 (HR [95%CI])    | 1 (reference) | 1.05 (0.77, 1.42) | 0.92 (0.67, 1.28) | 0.71 (0.51, 0.97) | 0.0076  | 0.81 (0.68, 0.96) |

Model 1: adjusted for age (years), sex (male, female), race/ethnicity (Non-Hispanic White, Non-Hispanic Black, Mexican American, other race), education (less than high school, high school or equivalent, college or above), marital status (married, widowed or divorced, separated, never married) and PIR ( $\leq 1$ , 1.1-3.0,  $>3.0$ ).

Model 2: additionally adjusted for BMI ( $\text{kg/m}^2$ ), smoking status (never, former, current), drinking status (never, former, current), total energy intake (kcal/d), physical activity (MET-min/week), use of antidiabetic medications (yes, no), hyperlipidemia (yes, no), hypertension (yes, no), cardiovascular disease (yes, no), and cancer (yes, no)

**Supplementary Table 4.** Hazard Ratios of all-cause, CVD, cancer and other mortality risk based on quartile of uPDI among participants with diabetes (N=4,621)

|                            | Quartile 1    | Quartile 2        | Quartile 3        | Quartile 4        | P-trend | Per 10 point increase |
|----------------------------|---------------|-------------------|-------------------|-------------------|---------|-----------------------|
| <b>All-cause mortality</b> |               |                   |                   |                   |         |                       |
| Deaths/N                   | 164/1,041     | 274/1,228         | 280/1,112         | 303/1,240         |         |                       |
| Model 1 (HR [95%CI])       | 1 (reference) | 1.53 (1.26, 1.85) | 1.76 (1.45, 2.14) | 1.99 (1.65, 2.41) | <0.0001 | 1.45 (1.31, 1.60)     |
| Model 2 (HR [95%CI])       | 1 (reference) | 1.50 (1.24, 1.83) | 1.63 (1.34, 1.98) | 1.88 (1.55, 2.28) | <0.0001 | 1.38 (1.25, 1.53)     |
| <b>CVD mortality</b>       |               |                   |                   |                   |         |                       |
| Deaths/N                   | 57/1,041      | 82/1,228          | 91/1,112          | 99/1,240          |         |                       |
| Model 1 (HR [95%CI])       | 1 (reference) | 1.31 (0.93, 1.84) | 1.64 (1.17, 2.28) | 1.87 (1.35, 2.60) | <0.0001 | 1.41 (1.18, 1.68)     |
| Model 2 (HR [95%CI])       | 1 (reference) | 1.29 (0.92, 1.81) | 1.44 (1.03, 2.02) | 1.71 (1.22, 2.38) | 0.0013  | 1.31 (1.10, 1.57)     |
| <b>Cancer mortality</b>    |               |                   |                   |                   |         |                       |
| Deaths/N                   | 34/1,041      | 64/1,228          | 50/1,112          | 63/1,240          |         |                       |

|                        |               |                   |                   |                   |         |                   |
|------------------------|---------------|-------------------|-------------------|-------------------|---------|-------------------|
| Model 1 (HR [95%CI])   | 1 (reference) | 1.75 (1.15, 2.65) | 1.53 (0.99, 2.37) | 2.05 (1.35, 3.11) | 0.0035  | 1.31 (1.06, 1.63) |
| Model 2 (HR [95%CI])   | 1 (reference) | 1.67 (1.10, 2.54) | 1.37 (0.87, 2.13) | 1.94 (1.27, 2.98) | 0.0113  | 1.25 (1.00, 1.56) |
| <b>Other mortality</b> |               |                   |                   |                   |         |                   |
| Deaths/N               | 73/1,041      | 128/1,228         | 139/1,112         | 141/1,240         |         |                   |
| Model 1 (HR [95%CI])   | 1 (reference) | 1.59 (1.19, 2.12) | 1.97 (1.48, 2.61) | 2.06 (1.55, 2.74) | <0.0001 | 1.55 (1.34, 1.79) |
| Model 2 (HR [95%CI])   | 1 (reference) | 1.60 (1.20, 2.14) | 1.90 (1.43, 2.54) | 2.02 (1.51, 2.69) | <0.0001 | 1.51 (1.30, 1.75) |

Model 1: adjusted for age (years), sex (male, female), race/ethnicity (Non-Hispanic White, Non-Hispanic Black, Mexican American, other race), education (less than high school, high school or equivalent, college or above), marital status (married, widowed or divorced, separated, never married) and PIR ( $\leq 1$ , 1.1-3.0,  $>3.0$ ).

Model 2: additionally adjusted for BMI (kg/m<sup>2</sup>), smoking status (never, former, current), drinking status (never, former, current), total energy intake (kcal/d), physical activity (MET-min/week), use of antidiabetic medications (yes, no), hyperlipidemia (yes, no), hypertension (yes, no), cardiovascular disease (yes, no), and cancer (yes, no).

**Supplementary Table 5.** Hazard Ratios of all-cause, CVD, cancer and other mortality risk based on quartile of uPDI among participants with prediabetes (N=8,061)

|                            | Quartile 1    | Quartile 2        | Quartile 3        | Quartile 4        | P-trend | Per 10 point increase |
|----------------------------|---------------|-------------------|-------------------|-------------------|---------|-----------------------|
| <b>All-cause mortality</b> |               |                   |                   |                   |         |                       |
| Deaths/N                   | 178/1,974     | 192/1,733         | 291/2,292         | 235/2,062         |         |                       |
| Model 1 (HR [95%CI])       | 1 (reference) | 1.18 (0.96, 1.45) | 1.63 (1.35, 1.97) | 1.79 (1.47, 2.18) | <0.0001 | 1.48 (1.33, 1.64)     |
| Model 2 (HR [95%CI])       | 1 (reference) | 1.13 (0.92, 1.39) | 1.52 (1.25, 1.84) | 1.63 (1.33, 1.99) | <0.0001 | 1.40 (1.25, 1.56)     |
| <b>CVD mortality</b>       |               |                   |                   |                   |         |                       |
| Deaths/N                   | 46/1,974      | 65/1,733          | 87/2,292          | 63/2,062          |         |                       |
| Model 1 (HR [95%CI])       | 1 (reference) | 1.56 (1.07, 2.28) | 1.94 (1.36, 2.78) | 1.92 (1.31, 2.80) | 0.0003  | 1.48 (1.22, 1.80)     |
| Model 2 (HR [95%CI])       | 1 (reference) | 1.52 (1.04, 2.22) | 1.77 (1.23, 2.54) | 1.71 (1.16, 2.51) | 0.0042  | 1.39 (1.13, 1.70)     |
| <b>Cancer mortality</b>    |               |                   |                   |                   |         |                       |
| Deaths/N                   | 60/1,974      | 46/1,733          | 73/2,292          | 56/2,062          |         |                       |
| Model 1 (HR [95%CI])       | 1 (reference) | 0.84 (0.57, 1.24) | 1.22 (0.86, 1.72) | 1.25 (0.87, 1.81) | 0.0830  | 1.27 (1.04, 1.56)     |
| Model 2 (HR [95%CI])       | 1 (reference) | 0.84 (0.57, 1.24) | 1.22 (0.86, 1.72) | 1.26 (0.87, 1.83) | 0.0867  | 1.27 (1.03, 1.57)     |
| <b>Other mortality</b>     |               |                   |                   |                   |         |                       |
| Deaths/N                   | 72/1,974      | 81/1,733          | 131/2,292         | 116/2,062         |         |                       |
| Model 1 (HR [95%CI])       | 1 (reference) | 1.22 (0.89, 1.68) | 1.75 (1.31, 2.34) | 2.11 (1.57, 2.83) | <0.0001 | 1.59 (1.35, 1.87)     |
| Model 2 (HR [95%CI])       | 1 (reference) | 1.14 (0.83, 1.57) | 1.58 (1.17, 2.11) | 1.86 (1.38, 2.52) | <0.0001 | 1.48 (1.25, 1.74)     |

Model 1: adjusted for age (years), sex (male, female), race/ethnicity (Non-Hispanic White, Non-Hispanic Black, Mexican American, other race), education (less than high school, high school or equivalent, college or above), marital status (married, widowed or divorced, separated, never married) and PIR ( $\leq 1$ , 1.1-3.0,  $>3.0$ ).

Model 2: additionally adjusted for BMI ( $\text{kg}/\text{m}^2$ ), smoking status (never, former, current), drinking status (never, former, current), total energy intake ( $\text{kcal}/\text{d}$ ), physical activity ( $\text{MET}\text{-min}/\text{week}$ ), use of antidiabetic medications (yes, no), hyperlipidemia (yes, no), hypertension (yes, no), cardiovascular disease (yes, no), and cancer (yes, no).

**Supplementary Table 6.** Associations between hPDI, uPDI and all-cause mortality among US adults after excluding participants with extreme energy intake ( $>4200$   $\text{kcal}/\text{d}$  or  $<800$   $\text{kcal}/\text{d}$  for men,  $>3500$   $\text{kcal}/\text{d}$  or  $<500$   $\text{kcal}/\text{d}$  for women) in NHANES 2007–2016

|                                                  | Diabetes (N=4,593) |                   |                   |                   | P-trend | Prediabetes (N= 8,044) |                   |                   |                   | P-trend |
|--------------------------------------------------|--------------------|-------------------|-------------------|-------------------|---------|------------------------|-------------------|-------------------|-------------------|---------|
| <b>hPDI (healthful plant-based diet index)</b>   |                    |                   |                   |                   |         |                        |                   |                   |                   |         |
|                                                  | Quartile 1         | Quartile2         | Quartile 3        | Quartile 4        |         | Quartile 1             | Quartile2         | Quartile 3        | Quartile 4        |         |
| Deaths/N                                         | 226/1,086          | 248/964           | 205/1,317         | 236/1,229         |         | 155/1,793              | 274/2,136         | 195/1,717         | 266/2,398         |         |
| Model 1 (HR [95%CI])                             | 1 (reference)      | 0.98 (0.82, 1.18) | 0.86 (0.72, 1.02) | 0.61 (0.51, 0.74) | <0.0001 | 1 (reference)          | 1.10 (0.91, 1.35) | 0.79 (0.63, 0.97) | 0.67 (0.55, 0.82) | <0.0001 |
| Model 2 (HR [95%CI])                             | 1 (reference)      | 0.98 (0.81, 1.18) | 0.84 (0.70, 1.01) | 0.60 (0.49, 0.73) | <0.0001 | 1 (reference)          | 1.13 (0.93, 1.39) | 0.82 (0.66, 1.02) | 0.71 (0.57, 0.88) | <0.0001 |
| <b>uPDI (unhealthful plant-based diet index)</b> |                    |                   |                   |                   |         |                        |                   |                   |                   |         |
|                                                  | Quartile 1         | Quartile2         | Quartile 3        | Quartile 4        |         | Quartile 1             | Quartile 2        | Quartile 3        | Quartile 4        |         |
| Deaths/N                                         | 165/1,037          | 953/1,223         | 278/1,105         | 299/1,228         |         | 177/1,963              | 194/1,738         | 289/2,289         | 230/2,054         |         |
| Model 1 (HR [95%CI])                             | 1 (reference)      | 1.48 (1.22, 1.80) | 1.73 (1.43, 2.10) | 1.97 (1.63, 2.38) | <0.0001 | 1 (reference)          | 1.19 (0.97, 1.45) | 1.62 (1.34, 1.95) | 1.72 (1.41, 2.09) | <0.0001 |
| Model 2 (HR [95%CI])                             | 1 (reference)      | 1.47 (1.21, 1.78) | 1.66 (1.36, 2.01) | 1.89 (1.55, 2.29) | <0.0001 | 1 (reference)          | 1.16 (0.94, 1.42) | 1.51 (1.24, 1.82) | 1.62 (1.32, 1.98) | <0.0001 |

Model 1: adjusted for age (years), sex (male, female), race/ethnicity (Non-Hispanic White, Non-Hispanic Black, Mexican American, other race), education (less than high school, high school or equivalent, college or above), marital status (married, widowed or divorced, separated, never married) and PIR ( $\leq 1$ , 1.1-3.0,  $>3.0$ ).

Model 2: additionally adjusted for BMI ( $\text{kg}/\text{m}^2$ ), smoking status (never, former, current), drinking status (never, former, current), total energy intake ( $\text{kcal}/\text{d}$ ), physical activity ( $\text{MET}\text{-min}/\text{week}$ ), use of antidiabetic medications (yes, no), hyperlipidemia (yes, no), hypertension (yes, no), cardiovascular disease (yes, no), and cancer (yes, no).



**Supplementary Table 7.** Associations between hPDI, uPDI and all-cause mortality among US adults after excluding participants with prevalent cardiovascular or cancer at baseline

|                                                  | Diabetes (N=3,057) |                   |                   |                   | P-trend | Prediabetes (N= 6,529) |                   |                   |                   | P-trend |
|--------------------------------------------------|--------------------|-------------------|-------------------|-------------------|---------|------------------------|-------------------|-------------------|-------------------|---------|
| <b>hPDI (healthful plant-based diet index)</b>   |                    |                   |                   |                   |         |                        |                   |                   |                   |         |
|                                                  | Quartile 1         | Quartile2         | Quartile 3        | Quartile 4        |         | Quartile 1             | Quartile2         | Quartile 3        | Quartile 4        |         |
| Deaths/N                                         | 104/743            | 97/631            | 133/869           | 114/814           |         | 88/1,486               | 146/1,712         | 115/1,387         | 141/1,944         |         |
| Model 1 (HR [95%CI])                             | 1 (reference)      | 0.88 (0.66, 1.16) | 0.86 (0.66, 1.12) | 0.66 (0.50, 0.86) | 0.0029  | 1 (reference)          | 1.13 (0.87, 1.48) | 0.85 (0.64, 1.13) | 0.64 (0.49, 0.85) | <0.0001 |
| Model 2 (HR [95%CI])                             | 1 (reference)      | 0.85 (0.64, 1.13) | 0.82 (0.63, 1.07) | 0.60 (0.45, 0.81) | 0.0007  | 1 (reference)          | 1.15 (0.88, 1.51) | 0.86 (0.64, 1.15) | 0.67 (0.50, 0.89) | 0.0001  |
| <b>uPDI (unhealthful plant-based diet index)</b> |                    |                   |                   |                   |         |                        |                   |                   |                   |         |
|                                                  | Quartile 1         | Quartile2         | Quartile 3        | Quartile 4        |         | Quartile 1             | Quartile 2        | Quartile 3        | Quartile 4        |         |
| Deaths/N                                         | 68/689             | 124/825           | 113/717           | 143/826           |         | 77/1,599               | 109/1,389         | 177/1,870         | 127/1,671         |         |
| Model 1 (HR [95%CI])                             | 1 (reference)      | 1.56 (1.16, 2.10) | 1.77 (1.31, 2.40) | 2.12 (1.59, 2.84) | <0.0001 | 1 (reference)          | 1.63 (1.22, 2.19) | 2.30 (1.75, 3.01) | 2.29 (1.72, 3.05) | <0.0001 |
| Model 2 (HR [95%CI])                             | 1 (reference)      | 1.54 (1.14, 2.07) | 1.66 (1.22, 2.26) | 2.00 (1.49, 2.69) | <0.0001 | 1 (reference)          | 1.62 (1.20, 2.16) | 2.20 (1.67, 2.89) | 2.15 (1.61, 2.87) | <0.0001 |

Model 1: adjusted for age (years), sex (male, female), race/ethnicity (Non-Hispanic White, Non-Hispanic Black, Mexican American, other race), education (less than high school, high school or equivalent, college or above), marital status (married, widowed or divorced, separated, never married) and PIR ( $\leq 1$ , 1.1-3.0,  $>3.0$ ).

Model 2: additionally adjusted for BMI (kg/m<sup>2</sup>), smoking status (never, former, current), drinking status (never, former, current), total energy intake (kcal/d), physical activity (MET-min/week), use of antidiabetic medications (yes, no), hyperlipidemia (yes, no), and hypertension (yes, no).

**Supplementary Table 8.** Associations between hPDI, uPDI and all-cause mortality among US adults after excluding excluding who died within 2 years of follow-up

|                                                  | Diabetes (N=4,434) |                   |                   |                   | <i>P</i> -trend | Prediabetes (N= 7,913) |                   |                   |                   | <i>P</i> -trend |
|--------------------------------------------------|--------------------|-------------------|-------------------|-------------------|-----------------|------------------------|-------------------|-------------------|-------------------|-----------------|
| <b>hPDI (healthful plant-based diet index)</b>   |                    |                   |                   |                   |                 |                        |                   |                   |                   |                 |
|                                                  | Quartile 1         | Quartile2         | Quartile 3        | Quartile 4        |                 | Quartile 1             | Quartile2         | Quartile 3        | Quartile 4        |                 |
| Deaths/N                                         | 181/1,053          | 204/917           | 248/1,269         | 201/1,195         |                 | 134/1,780              | 215/2,080         | 163/1,683         | 236/2,370         |                 |
| Model 1 (HR [95%CI])                             | 1 (reference)      | 1.08 (0.81, 1.45) | 0.84 (0.63, 1.12) | 0.70 (0.52, 0.94) | 0.0031          | 1 (reference)          | 1.02 (0.82, 1.27) | 0.77 (0.61, 0.97) | 0.69 (0.56, 0.86) | <0.0001         |
| Model 2 (HR [95%CI])                             | 1 (reference)      | 1.04 (0.85, 1.28) | 0.88 (0.72, 1.08) | 0.65 (0.52, 0.80) | <0.0001         | 1 (reference)          | 1.03 (0.82, 1.28) | 0.79 (0.62, 1.00) | 0.72 (0.57, 0.91) | 0.0003          |
| <b>uPDI (unhealthful plant-based diet index)</b> |                    |                   |                   |                   |                 |                        |                   |                   |                   |                 |
|                                                  | Quartile 1         | Quartile2         | Quartile 3        | Quartile 4        |                 | Quartile 1             | Quartile 2        | Quartile 3        | Quartile 4        |                 |
| Deaths/N                                         | 142/1,001          | 222/1,183         | 231/1,064         | 239/1,186         |                 | 156/1,943              | 165/1,701         | 237/2,247         | 190/2,022         |                 |
| Model 1 (HR [95%CI])                             | 1 (reference)      | 1.40 (1.13, 1.72) | 1.66 (1.34, 2.05) | 1.79 (1.45, 2.20) | <0.0001         | 1 (reference)          | 1.16 (0.93, 1.44) | 1.49 (1.21, 1.82) | 1.60 (1.30, 1.99) | <0.0001         |
| Model 2 (HR [95%CI])                             | 1 (reference)      | 1.39 (1.12, 1.72) | 1.55 (1.25, 1.92) | 1.69 (1.37, 2.09) | <0.0001         | 1 (reference)          | 1.12 (0.90, 1.40) | 1.41 (1.14, 1.73) | 1.49 (1.20, 1.86) | <0.0001         |

Model 1: adjusted for age (years), sex (male, female), race/ethnicity (Non-Hispanic White, Non-Hispanic Black, Mexican American, other race), education (less than high school, high school or equivalent, college or above), marital status (married, widowed or divorced, separated, never married) and PIR ( $\leq 1$ , 1.1-3.0,  $>3.0$ ).

Model 2: additionally adjusted for BMI (kg/m<sup>2</sup>), smoking status (never, former, current), drinking status (never, former, current), total energy intake (kcal/d), physical activity (MET-min/week), use of antidiabetic medications (yes, no), hyperlipidemia (yes, no), hypertension (yes, no), cardiovascular disease (yes, no), and cancer (yes, no).

**Supplementary Table 9.** Hazard ratios (95% CIs) for the associations between hPDI, uPDI and all-cause mortality among US adults after excluding every component in NHANES 2007–2016

|                               | Diabetes          |                   | Prediabetes       |                   |
|-------------------------------|-------------------|-------------------|-------------------|-------------------|
|                               | hPDI              | uPDI              | hPDI              | uPDI              |
| Excluding whole grain         | 0.70 (0.65, 0.80) | 1.42 (1.28, 1.58) | 0.76 (0.67, 0.85) | 1.42 (1.27, 1.60) |
| Excluding fruit               | 0.74 (0.67, 0.82) | 1.39 (1.25, 1.54) | 0.79 (0.70, 0.89) | 1.37 (1.23, 1.54) |
| Excluding vegetates           | 0.75 (0.67, 0.83) | 1.36 (1.21, 1.52) | 0.80 (0.71, 0.90) | 1.37 (1.22, 1.55) |
| Excluding nuts                | 0.73 (0.65, 0.81) | 1.39 (1.25, 1.55) | 0.77 (0.68, 0.87) | 1.40 (1.24, 1.57) |
| Excluding legumes             | 0.74 (0.66, 0.82) | 1.37 (1.23, 1.52) | 0.78 (0.69, 0.88) | 1.39 (1.24, 1.56) |
| Excluding tea and coffee      | 0.74 (0.66, 0.82) | 1.40 (1.26, 1.57) | 0.78 (0.69, 0.88) | 1.40 (1.25, 1.58) |
| Excluding fruit juice         | 0.73 (0.66, 0.82) | 1.39 (1.25, 1.55) | 0.75 (0.67, 0.84) | 1.43 (1.28, 1.59) |
| Excluding refined grain       | 0.71 (0.64, 0.79) | 1.44 (1.30, 1.60) | 0.74 (0.66, 0.83) | 1.46 (1.30, 1.63) |
| Excluding SSBs                | 0.71 (0.64, 0.80) | 1.45 (1.30, 1.61) | 0.76 (0.68, 0.86) | 1.43 (1.27, 1.61) |
| Excluding sweets and desserts | 0.72 (0.65, 0.80) | 1.43 (1.29, 1.59) | 0.75 (0.66, 0.84) | 1.44 (1.29, 1.61) |
| Excluding potatoes            | 0.73 (0.66, 0.81) | 1.40 (1.27, 1.56) | 0.76 (0.68, 0.85) | 1.42 (1.27, 1.58) |
| Excluding eggs                | 0.72 (0.65, 0.80) | 1.42 (1.28, 1.57) | 0.74 (0.66, 0.83) | 1.40 (1.26, 1.57) |
| Excluding dairy               | 0.74 (0.67, 0.82) | 1.44 (1.30, 1.60) | 0.78 (0.69, 0.87) | 1.44 (1.29, 1.61) |
| Excluding seafood             | 0.69 (0.62, 0.76) | 1.38 (1.24, 1.54) | 0.72 (0.64, 0.81) | 1.38 (1.23, 1.55) |
| Excluding meat                | 0.73 (0.65, 0.81) | 1.41 (1.27, 1.56) | 0.76 (0.68, 0.85) | 1.40 (1.26, 1.56) |

Data were adjusted for age (years), sex (male, female), race/ethnicity (Non-Hispanic White, Non-Hispanic Black, Mexican American, other race), education (less than high school, high school or equivalent, college or above), marital status (married, widowed or divorced, separated, never married), PIR ( $\leq 1$ , 1.1-3.0,  $>3.0$ ), BMI ( $\text{kg}/\text{m}^2$ ), smoking status (never, former, current), drinking status (never, former, current), total energy intake ( $\text{kcal}/\text{d}$ ), physical activity ( $\text{MET}\text{-min}/\text{week}$ ), use of antidiabetic medications (yes, no), hyperlipidemia (yes, no), hypertension (yes, no), cardiovascular disease (yes, no), and cancer (yes, no).

SSBs: Sugar sweetened beverages

**Supplementary Table 10.** Hazard ratios (95% CIs) for the relationship between food components and all-cause mortality among population with diabetes or prediabetes

| Components          | Diabetes                   |                   |                   |                 | <i>P</i> -trend | Prediabetes                |                   |         |                 |
|---------------------|----------------------------|-------------------|-------------------|-----------------|-----------------|----------------------------|-------------------|---------|-----------------|
|                     | Tertile for the components |                   |                   | <i>P</i> -trend |                 | Tertile for the components |                   |         | <i>P</i> -trend |
|                     | T1                         | T2                | T3                |                 |                 | T1                         | T2                | T3      |                 |
| Whole grain         | 1 (reference)              | 0.89 (0.76, 1.05) | 0.90 (0.77, 1.06) | 0.201           | 1 (reference)   | 0.97 (0.81, 1.15)          | 0.89 (0.74, 1.06) | 0.157   |                 |
| Fruit               | 1 (reference)              | 0.94 (0.80, 1.09) | 0.79 (0.68, 0.93) | 0.004           | 1 (reference)   | 0.90 (0.76, 1.06)          | 0.74 (0.62, 0.89) | 0.001   |                 |
| Vegetables          | 1 (reference)              | 0.92 (0.79, 1.08) | 0.84 (0.72, 0.99) | 0.038           | 1 (reference)   | 0.83 (0.71, 0.98)          | 0.68 (0.57, 0.81) | <0.0001 |                 |
| Nuts                | 1 (reference)              | 0.89 (0.71, 1.11) | 0.87 (0.75, 1.00) | 0.045           | 1 (reference)   | 0.89 (0.72, 1.10)          | 0.87 (0.75, 1.02) | 0.080   |                 |
| Legumes             | 1 (reference)              | 0.89 (0.70, 1.13) | 0.78 (0.67, 0.90) | 0.001           | 1 (reference)   | 1.03 (0.82, 1.30)          | 0.83 (0.71, 0.96) | 0.022   |                 |
| Tea and coffee      | 1 (reference)              | 0.89 (0.76, 1.06) | 0.88 (0.76, 1.01) | 0.070           | 1 (reference)   | 0.91 (0.75, 1.10)          | 0.83 (0.72, 0.97) | 0.020   |                 |
| Fruit juice         | 1 (reference)              | 1.07 (0.88, 1.30) | 1.16 (1.01, 1.33) | 0.032           | 1 (reference)   | 0.91 (0.75, 1.11)          | 1.06 (0.91, 1.23) | 0.442   |                 |
| Refined grain       | 1 (reference)              | 1.01 (0.87, 1.17) | 0.95 (0.81, 1.12) | 0.590           | 1 (reference)   | 0.87 (0.75, 1.02)          | 0.70 (0.59, 0.84) | 0.0001  |                 |
| SSBs                | 1 (reference)              | 0.82 (0.63, 1.07) | 1.05 (0.89, 1.24) | 0.647           | 1 (reference)   | 1.07 (0.87, 1.31)          | 1.02 (0.87, 1.20) | 0.748   |                 |
| Sweets and desserts | 1 (reference)              | 0.96 (0.80, 1.16) | 1.04 (0.91, 1.20) | 0.570           | 1 (reference)   | 0.95 (0.79, 1.14)          | 1.01 (0.87, 1.17) | 0.910   |                 |
| Potatoes            | 1 (reference)              | 0.84 (0.71, 0.98) | 0.98 (0.85, 1.14) | 0.886           | 1 (reference)   | 0.98 (0.82, 1.16)          | 0.94 (0.80, 1.10) | 0.440   |                 |
| Eggs                | 1 (reference)              | 0.93 (0.80, 1.09) | 0.98 (0.84, 1.15) | 0.766           | 1 (reference)   | 0.89 (0.76, 1.05)          | 0.94 (0.79, 1.11) | 0.483   |                 |
| Dairy               | 1 (reference)              | 1.19 (1.02, 1.39) | 1.10 (0.93, 1.29) | 0.263           | 1 (reference)   | 1.03 (0.87, 1.22)          | 1.07 (0.90, 1.27) | 0.414   |                 |
| Seafood             | 1 (reference)              | 0.74 (0.55, 1.00) | 0.85 (0.73, 0.99) | 0.024           | 1 (reference)   | 0.93 (0.67, 1.29)          | 0.80 (0.67, 0.94) | 0.007   |                 |
| Meat                | 1 (reference)              | 1.01 (0.87, 1.18) | 0.98 (0.84, 1.15) | 0.820           | 1 (reference)   | 0.94 (0.80, 1.11)          | 0.97 (0.82, 1.15) | 0.724   |                 |

All food groups (except coffee and tea) were adjusted for total energy intake (2000 kcal/day) before analysis.

Models were adjusted for age (years), sex (male, female), race/ethnicity (Non-Hispanic White, Non-Hispanic Black, Mexican American, other race), education (less than high school, high school or equivalent, college or above), marital status (married, widowed or divorced, separated, never married), PIR ( $\leq 1$ , 1.1-3.0,  $>3.0$ ), BMI (kg/m<sup>2</sup>), smoking status (never, former, current), drinking status (never, former, current), total energy intake (kcal/d), physical activity (MET-min/week), use of antidiabetic medications (yes, no), hyperlipidemia (yes, no), hypertension (yes, no), cardiovascular disease (yes, no), and cancer (yes, no), in addition to the remaining 14 food groups.

SSBs: Sugar sweetened beverages

**Supplementary Table 11.** Hazard ratios (95% CIs) for the relationship between food components and CVD mortality among population with diabetes or prediabetes

| Components | Diabetes                   |    |    | <i>P</i> -trend | Prediabetes                |    |    |                 |
|------------|----------------------------|----|----|-----------------|----------------------------|----|----|-----------------|
|            | Tertile for the components |    |    |                 | Tertile for the components |    |    | <i>P</i> -trend |
|            | T1                         | T2 | T3 |                 | T1                         | T2 | T3 |                 |

|                     |               |                   |                   |       |               |                   |                   |       |
|---------------------|---------------|-------------------|-------------------|-------|---------------|-------------------|-------------------|-------|
| Whole grain         | 1 (reference) | 0.95 (0.72, 1.25) | 0.73 (0.54, 0.97) | 0.029 | 1 (reference) | 0.71 (0.51, 0.99) | 0.72 (0.52, 0.99) | 0.056 |
| Fruit               | 1 (reference) | 0.92 (0.70, 1.21) | 0.76 (0.58, 1.00) | 0.051 | 1 (reference) | 0.90 (0.65, 1.26) | 0.87 (0.62, 1.21) | 0.420 |
| Vegetables          | 1 (reference) | 0.92 (0.70, 1.20) | 0.95 (0.72, 1.25) | 0.718 | 1 (reference) | 0.83 (0.62, 1.12) | 0.70 (0.51, 0.96) | 0.027 |
| Nuts                | 1 (reference) | 0.96 (0.65, 1.42) | 0.93 (0.72, 1.20) | 0.600 | 1 (reference) | 1.02 (0.70, 1.50) | 0.85 (0.64, 1.14) | 0.299 |
| Legumes             | 1 (reference) | 0.75 (0.47, 1.17) | 0.77 (0.60, 1.00) | 0.039 | 1 (reference) | 0.92 (0.58, 1.45) | 0.80 (0.60, 1.07) | 0.135 |
| Tea and coffee      | 1 (reference) | 0.82 (0.61, 1.12) | 0.93 (0.72, 1.19) | 0.500 | 1 (reference) | 0.77 (0.54, 1.10) | 0.75 (0.57, 1.00) | 0.040 |
| Fruit juice         | 1 (reference) | 1.17 (0.85, 1.63) | 1.16 (0.91, 1.48) | 0.221 | 1 (reference) | 0.76 (0.52, 1.12) | 1.13 (0.86, 1.48) | 0.397 |
| Refined grain       | 1 (reference) | 1.06 (0.82, 1.38) | 0.86 (0.64, 1.16) | 0.373 | 1 (reference) | 0.84 (0.63, 1.12) | 0.67 (0.48, 0.94) | 0.019 |
| SSBs                | 1 (reference) | 0.46 (0.25, 0.84) | 0.96 (0.72, 1.28) | 0.467 | 1 (reference) | 1.11 (0.77, 1.62) | 0.85 (0.62, 1.17) | 0.397 |
| Sweets and desserts | 1 (reference) | 0.75 (0.52, 1.09) | 1.21 (0.95, 1.54) | 0.132 | 1 (reference) | 1.02 (0.73, 1.45) | 1.09 (0.82, 1.44) | 0.565 |
| Potatoes            | 1 (reference) | 0.77 (0.58, 1.02) | 0.92 (0.71, 1.19) | 0.525 | 1 (reference) | 0.75 (0.54, 1.04) | 0.76 (0.57, 1.01) | 0.057 |
| Eggs                | 1 (reference) | 0.90 (0.68, 1.19) | 0.93 (0.71, 1.22) | 0.628 | 1 (reference) | 0.88 (0.64, 1.21) | 1.12 (0.83, 1.51) | 0.410 |
| Dairy               | 1 (reference) | 1.25 (0.94, 1.65) | 1.20 (0.91, 1.60) | 0.201 | 1 (reference) | 1.11 (0.81, 1.52) | 1.22 (0.89, 1.68) | 0.214 |
| Seafood             | 1 (reference) | 0.84 (0.51, 1.38) | 0.93 (0.71, 1.21) | 0.527 | 1 (reference) | 0.54 (0.25, 1.15) | 0.70 (0.51, 0.96) | 0.019 |
| Meat                | 1 (reference) | 0.94 (0.71, 1.24) | 1.07 (0.81, 1.41) | 0.637 | 1 (reference) | 1.12 (0.82, 1.52) | 1.10 (0.80, 1.52) | 0.553 |

All food groups (except coffee and tea) were adjusted for total energy intake (2000 kcal/day) before analysis.

Models were adjusted for age (years), sex (male, female), race/ethnicity (Non-Hispanic White, Non-Hispanic Black, Mexican American, other race), education (less than high school, high school or equivalent, college or above), marital status (married, widowed or divorced, separated, never married), PIR ( $\leq 1$ , 1.1-3.0,  $>3.0$ ), BMI ( $\text{kg/m}^2$ ), smoking status (never, former, current), drinking status (never, former, current), total energy intake (kcal/d), physical activity (MET-min/week), use of antidiabetic medications (yes, no), hyperlipidemia (yes, no), hypertension (yes, no), cardiovascular disease (yes, no), and cancer (yes, no), in addition to the remaining 14 food groups.

SSBs: Sugar sweetened beverages

**Supplementary Table 12.** Hazard ratios (95% CIs) for the relationship between food components and cancer mortality among population with diabetes or prediabetes

| Components  | Diabetes                   |                   |                   | <i>P</i> -trend | Prediabetes                |                   |                   | <i>P</i> -trend |
|-------------|----------------------------|-------------------|-------------------|-----------------|----------------------------|-------------------|-------------------|-----------------|
|             | Tertile for the components |                   |                   |                 | Tertile for the components |                   |                   |                 |
|             | T1                         | T2                | T3                |                 | T1                         | T2                | T3                |                 |
| Whole grain | 1 (reference)              | 1.09 (0.76, 1.55) | 1.10 (0.76, 1.59) | 0.600           | 1 (reference)              | 1.04 (0.74, 1.47) | 1.08 (0.76, 1.52) | 0.678           |
| Fruit       | 1 (reference)              | 0.97 (0.69, 1.35) | 0.58 (0.40, 0.85) | 0.004           | 1 (reference)              | 0.87 (0.62, 1.21) | 0.62 (0.43, 0.89) | 0.009           |
| Vegetables  | 1 (reference)              | 0.86 (0.61, 1.21) | 0.91 (0.64, 1.28) | 0.579           | 1 (reference)              | 0.82 (0.60, 1.14) | 0.86 (0.62, 1.20) | 0.392           |
| Nuts        | 1 (reference)              | 0.94 (0.56, 1.56) | 1.09 (0.80, 1.49) | 0.610           | 1 (reference)              | 0.82 (0.54, 1.25) | 0.90 (0.67, 1.22) | 0.490           |
| Legumes     | 1 (reference)              | 1.00 (0.61, 1.65) | 0.77 (0.55, 1.06) | 0.116           | 1 (reference)              | 1.01 (0.65, 1.58) | 0.78 (0.57, 1.06) | 0.127           |

|                     |               |                   |                   |       |               |                   |                   |       |
|---------------------|---------------|-------------------|-------------------|-------|---------------|-------------------|-------------------|-------|
| Tea and coffee      | 1 (reference) | 1.06 (0.74, 1.52) | 0.96 (0.70, 1.31) | 0.809 | 1 (reference) | 1.43 (1.01, 2.02) | 0.95 (0.71, 1.28) | 0.853 |
| Fruit juice         | 1 (reference) | 1.15 (0.75, 1.77) | 1.56 (1.15, 2.10) | 0.004 | 1 (reference) | 0.91 (0.63, 1.33) | 1.01 (0.75, 1.35) | 0.947 |
| Refined grain       | 1 (reference) | 1.15 (0.83, 1.61) | 1.15 (0.79, 1.66) | 0.447 | 1 (reference) | 0.96 (0.71, 1.30) | 0.81 (0.57, 1.15) | 0.251 |
| SSBs                | 1 (reference) | 1.17 (0.69, 1.98) | 1.04 (0.72, 1.49) | 0.763 | 1 (reference) | 1.08 (0.71, 1.63) | 1.24 (0.91, 1.70) | 0.170 |
| Sweets and desserts | 1 (reference) | 1.12 (0.76, 1.65) | 0.83 (0.60, 1.15) | 0.299 | 1 (reference) | 0.87 (0.60, 1.25) | 1.14 (0.85, 1.52) | 0.399 |
| Potatoes            | 1 (reference) | 0.81 (0.56, 1.16) | 1.06 (0.77, 1.46) | 0.716 | 1 (reference) | 0.97 (0.70, 1.36) | 0.94 (0.69, 1.28) | 0.685 |
| Eggs                | 1 (reference) | 0.84 (0.59, 1.20) | 1.12 (0.80, 1.56) | 0.475 | 1 (reference) | 0.91 (0.66, 1.27) | 1.02 (0.74, 1.42) | 0.841 |
| Dairy               | 1 (reference) | 1.31 (0.94, 1.84) | 1.06 (0.74, 1.51) | 0.745 | 1 (reference) | 0.90 (0.65, 1.25) | 0.97 (0.70, 1.35) | 0.862 |
| Seafood             | 1 (reference) | 0.80 (0.43, 1.50) | 1.02 (0.74, 1.41) | 0.976 | 1 (reference) | 1.30 (0.75, 2.26) | 0.96 (0.70, 1.32) | 0.905 |
| Meat                | 1 (reference) | 1.07 (0.75, 1.51) | 1.22 (0.86, 1.74) | 0.267 | 1 (reference) | 1.01 (0.73, 1.39) | 1.09 (0.78, 1.53) | 0.608 |

All food groups (except coffee and tea) were adjusted for total energy intake (2000 kcal/day) before analysis.

Models were adjusted for age (years), sex (male, female), race/ethnicity (Non-Hispanic White, Non-Hispanic Black, Mexican American, other race), education (less than high school, high school or equivalent, college or above), marital status (married, widowed or divorced, separated, never married), PIR ( $\leq 1$ , 1.1-3.0,  $>3.0$ ), BMI ( $\text{kg}/\text{m}^2$ ), smoking status (never, former, current), drinking status (never, former, current), total energy intake (kcal/d), physical activity (MET-min/week), use of antidiabetic medications (yes, no), hyperlipidemia (yes, no), hypertension (yes, no), cardiovascular disease (yes, no), and cancer (yes, no), in addition to the remaining 14 food groups.

SSBs:

Sugar

sweetened

beverages

**Supplementary Table 13.** Associations between hPDI, uPDI and cardiometabolic biomarkers among those with diabetes

|                                   | hPDI                       |          | uPDI                      |          |
|-----------------------------------|----------------------------|----------|---------------------------|----------|
|                                   | $\beta$ (95% CI)           | <i>P</i> | $\beta$ (95% CI)          | <i>P</i> |
| GGT (n=4,379), U / L              | -0.0049 (-0.0082, -0.0016) | 0.004    | 0.0047 (0.0014, 0.0080)   | 0.005    |
| CRP (n=2,322), mg/dL              | -0.0124 (-0.0208, -0.0039) | 0.004    | 0.0116 (0.0032, 0.0201)   | 0.007    |
| HbA1c (n=4,481), %                | -0.0008 (-0.0018, 0.0001)  | 0.092    | 0.0009 (-0.0001, 0.0018)  | 0.067    |
| FPG (n=2,505), mmol/L             | -0.0007 (-0.0028, 0.0015)  | 0.542    | 0.0020 (-0.0001, 0.0041)  | 0.060    |
| Insulin (n=2,430), pmol/L         | -0.0010 (-0.0060, 0.0040)  | 0.701    | 0.0033 (-0.0016, 0.0081)  | 0.190    |
| Triglycerides (n=2,435), mmol/L   | -0.0004 (-0.0042, 0.0033)  | 0.830    | 0.0034 (-0.0002, 0.0071)  | 0.065    |
| HDL cholesterol (n=4,407), mmol/L | 0.0006 (-0.0007, 0.0019)   | 0.392    | -0.0009 (-0.0002, 0.0004) | 0.193    |
| LDL cholesterol (n=2,347), mmol/L | -0.0016 (-0.0039, 0.0007)  | 0.183    | 0.0017 (-0.0005, 0.0040)  | 0.130    |
| AST (n=4,377), U/L                | 0.0014 (-0.0004, 0.0033)   | 0.127    | -0.0012 (-0.0031, 0.0006) | 0.185    |

The levels of biomarkers were ln-transformed before analyses. Data were adjusted for age (years), sex (male, female), race/ethnicity (Non-Hispanic White, Non-Hispanic Black, Mexican American, other race), education (less than high school, high school or equivalent, college or above), marital status (married, widowed or divorced, separated, never married), PIR ( $\leq 1$ , 1.1-3.0,  $>3.0$ ), BMI (kg/m<sup>2</sup>), smoking status (never, former, current), drinking status (never, former, current), total energy intake (kcal/d), physical activity (MET-min/week), use of antidiabetic medications (yes, no), hyperlipidemia (yes, no), hypertension (yes, no), cardiovascular disease (yes, no), and cancer (yes, no).

AST: aspartate aminotransferase; CRP: C-reactive protein; FPG: fasting plasma glucose; GGT:  $\gamma$ -glutamine transaminase; HbA1c: glycated hemoglobin A1c; HDL: high-density lipoprotein; LDL: low-density lipoprotein.

**Supplementary Table 14.** Associations between hPDI, uPDI and cardiometabolic biomarkers among those with prediabetes

|                                   | hPDI                       |          | uPDI                       |          |
|-----------------------------------|----------------------------|----------|----------------------------|----------|
|                                   | $\beta$ (95% CI)           | <i>P</i> | $\beta$ (95% CI)           | <i>P</i> |
| GGT (n=7,970), U / L              | -0.0010 (-0.0032, 0.0012)  | 0.353    | -0.0005 (-0.0027, 0.0016)  | 0.619    |
| CRP (n=4,245), mg/dL              | -0.0090 (-0.0157, -0.0024) | 0.008    | 0.0055 (-0.0009, 0.0119)   | 0.092    |
| HbA1c (n=8,055), %                | -0.0001 (-0.0002, 0.0003)  | 0.978    | -0.0002 (-0.0004, 0.0000)  | 0.063    |
| FPG (n=4,979), mmol/L             | -0.0005 (-0.0008, -0.0001) | 0.019    | 0.0002 (-0.0001, 0.0006)   | 0.194    |
| Insulin (n=4,889), pmol/L         | -0.0064 (-0.0091, -0.0038) | <0.0001  | 0.0036 (0.0011, 0.0062)    | 0.006    |
| Triglycerides (n=4,900), mmol/L   | -0.0019 (-0.0043, 0.0006)  | 0.140    | 0.0040 (0.0016, 0.0064)    | 0.001    |
| HDL cholesterol (n=7,995), mmol/L | 0.0013 (0.0003, 0.0022)    | 0.010    | -0.0021 (-0.0030, -0.0011) | <0.0001  |
| LDL cholesterol (n=4,814), mmol/L | -0.0006 (-0.0020, 0.0008)  | 0.414    | 0.0002 (-0.0012, 0.0017)   | 0.733    |
| AST (n=7,964), U/L                | 0.0027 (0.0016, 0.0039)    | <0.0001  | -0.0023 (-0.0034, -0.0011) | <0.0001  |

The levels of biomarkers were ln-transformed before analyses. Data were adjusted for age (years), sex (male, female), race/ethnicity (Non-Hispanic White, Non-Hispanic Black, Mexican American, other race), education (less than high school, high school or equivalent, college or above), marital status (married, widowed or divorced, separated, never married), PIR ( $\leq 1$ , 1.1-3.0,  $>3.0$ ), BMI (kg/m<sup>2</sup>), smoking status (never, former, current), drinking status (never, former, current), total energy intake (kcal/d), physical activity (MET-min/week), use of antidiabetic medications (yes, no), hyperlipidemia (yes, no), hypertension (yes, no), cardiovascular disease (yes, no), and cancer (yes, no).

AST: aspartate aminotransferase; CRP: C-reactive protein; FPG: fasting plasma glucose; GGT:  $\gamma$ -glutamine transaminase; HbA1c: glycated hemoglobin A1c; HDL: high-density lipoprotein; LDL: low-density lipoprotein.

**Supplementary Table 15.** Hazard ratios (95% CIs) of all-cause mortality associated with cardiometabolic biomarkers among individuals with diabetes and prediabetes

|                         | Diabetes          |          | Prediabetes                    |          |
|-------------------------|-------------------|----------|--------------------------------|----------|
|                         | HR (95% CIs)      | <i>P</i> | HR (95% CIs)                   | <i>P</i> |
| GGT, U / L              | 1.38 (1.26, 1.51) | <0.0001  | 1.37 (1.23, 1.52)              | <0.0001  |
| CRP, mg/dL              | 1.20 (1.12, 1.28) | <0.0001  | 1.17 (1.10, 1.25)              | <0.0001  |
| HbA1c, %                | NA                | NA       | NA                             | NA       |
| FPG, mmol/L             | NA                | NA       | 0.97 (0.81, 1.17) <sup>a</sup> | 0.083    |
| Insulin, pmol/L         | NA                | NA       | 0.87 (0.74, 1.02) <sup>a</sup> | 0.089    |
| Triglycerides, mmol/L   | NA                | NA       | 0.94 (0.78, 1.13) <sup>a</sup> | 0.511    |
| HDL cholesterol, mmol/L | NA                | NA       | 0.93 (0.72, 1.19) <sup>a</sup> | 0.551    |
| LDL cholesterol, mmol/L | NA                | NA       | NA                             | NA       |
| AST, U/L                | NA                | NA       | 1.27 (1.02, 1.59) <sup>b</sup> | 0.035    |

NA: not applicable as a mediator because the biomarker was not associated with hPDI or uPDI.

a: the biomarker was not associated with all-cause mortality.

b: although AST was associated with a higher risk of all-cause mortality in prediabetes, it was positively associated with hPDI or was inversely associated with uPDI in prediabetes, and so was not eligible for the mediation analysis.

The levels of biomarkers were ln-transformed before analyses. Data were adjusted for age (years), sex (male, female), race/ethnicity (Non-Hispanic White, Non-Hispanic Black, Mexican American, other race), education (less than high school, high school or equivalent, college or above), marital status (married, widowed or divorced, separated, never married), PIR ( $\leq 1$ , 1.1-3.0,  $>3.0$ ), BMI (kg/m<sup>2</sup>), smoking status (never, former, current), drinking status (never, former, current), total energy intake (kcal/d), physical activity (MET-min/week), use of antidiabetic medications (yes, no), hyperlipidemia (yes, no), hypertension (yes, no), cardiovascular disease (yes, no), and cancer (yes, no).
